# Supplementary material for: Relationship between the Grade and the Characteristic Flavor of PCT (Panyong Congou Black Tea)
Source: MDPI journal article supplement (doi:10.3390/foods11182815), 2022-09-13
Supplement: s1 [file s1]

**Figure S1. Aroma compositions in four grades PCT obtained from GC–IMS analysis.**

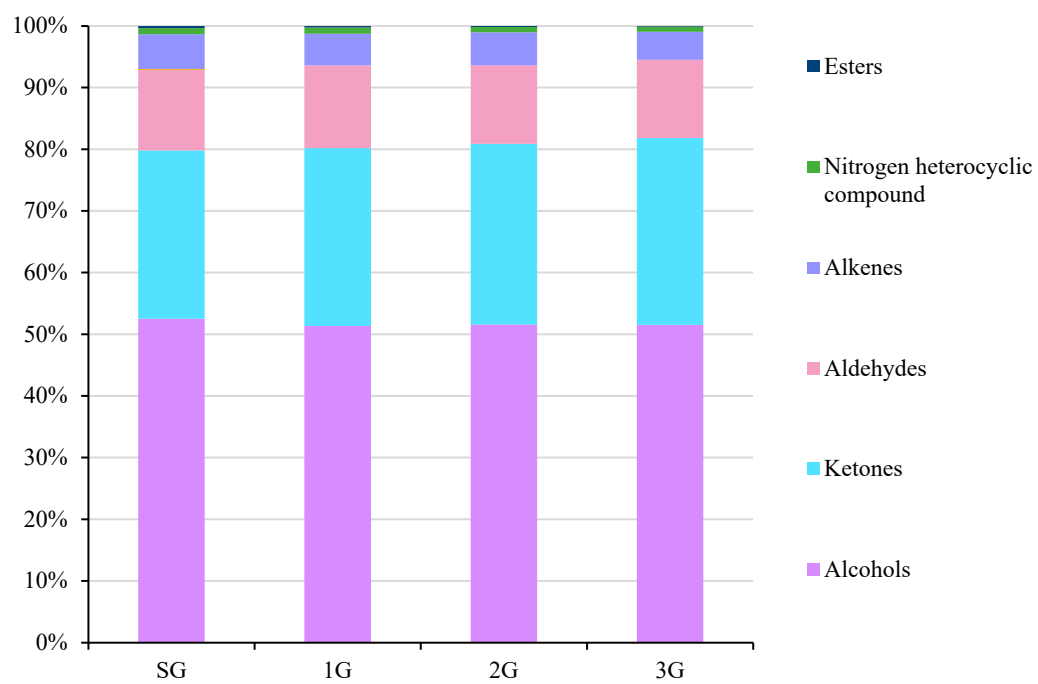

**Table S1 Contents of biochemical components in standard samples of different grades of PCT**

| Classification                  | Content       |               |               |               |
|---------------------------------|---------------|---------------|---------------|---------------|
|                                 | SG            | 1G            | 2G            | 3G            |
| Gallic acid (mg/g)              | 1.881±0.122   | 1.755±0.093   | 1.581±0.274   | 1.463±0.028   |
| Catechin (mg/g)                 | 2.435±0.051   | 1.711±0.086   | 1.958±0.091   | 1.572±0.056   |
| Epicatechin (mg/g)              | 1.251±0.016   | 1.224±0.466   | 1.947±0.033   | 2.112±0.338   |
| Epicatechin gallate (mg/g)      | 4.890±0.341   | 4.581±0.223   | 7.234±0.321   | 7.173±0.205   |
| Epigallocatechin gallate (mg/g) | 81.600±2.048  | 81.110±1.126  | 95.830±0.862  | 95.320±0.555  |
| Epigallocatechin (mg/g)         | 20.662±0.631  | 20.031±0.264  | 17.265±0.221  | 16.372±0.687  |
| Total Catechin                  | 110.836±0.633 | 109.130±0.431 | 124.211±0.380 | 122.522±0.363 |
| Caffeine (mg/g)                 | 30.201±1.591  | 28.464±0.375  | 29.115±0.326  | 31.266±2.251  |

**Table S2** GC–IMS integration parameters of volatile compounds to distinguish different grades of Tanyang Congou

| Count | Compound                    | CAS#      | Formula | MW    | RI     | Rt [sec] | Dt [a.u.] |
|-------|-----------------------------|-----------|---------|-------|--------|----------|-----------|
| 1     | Octen-3-ol                  | 3391-86-4 | C8H16O  | 128.2 | 997.3  | 574.633  | 1.175     |
| 2     | $\alpha$ -Terpineol         | 98-55-5   | C10H18O | 154.3 | 1160.8 | 1030.516 | 1.199     |
| 2'    | $\alpha$ -Terpineol (dimer) | 98-55-5   | C10H18O | 154.3 | 1160.3 | 1028.607 | 1.294     |
| 3     | Linalool                    | 78-70-6   | C10H18O | 154.3 | 1101.6 | 833.327  | 1.218     |
| 3'    | Linalool(dimer)             | 78-70-6   | C10H18O | 154.3 | 1088.8 | 795.828  | 1.747     |
| 4     | 1,8-Cineole                 | 470-82-6  | C10H18O | 154.3 | 1040.6 | 669.972  | 1.741     |
| 5     | 1-Octen-3-ol                | 3391-86-4 | C8H16O  | 128.2 | 990.4  | 560.749  | 1.158     |
| 5'    | 1-Octen-3-ol(dimer)         | 3391-86-4 | C8H16O  | 128.2 | 989.4  | 558.907  | 1.593     |
| 6     | 2-Hexen-1-ol                | 2305-21-7 | C6H12O  | 100.2 | 844    | 337.616  | 1.173     |
| 7     | 2-Phenylethanol             | 1960/12/8 | C8H10O  | 122.2 | 1111   | 861.890  | 1.293     |
| 7'    | 2-Phenylethanol(dimer)      | 1960/12/8 | C8H10O  | 122.2 | 1106.6 | 848.481  | 1.519     |
| 8     | n-Hexanol                   | 66-25-1   | C6H12O  | 100.2 | 764.7  | 258.826  | 1.260     |
| 9     | 1-Octanol                   | 111-87-5  | C8H18O  | 130.2 | 1053.1 | 700.615  | 1.457     |
| 10    | 1-Pentanol                  | 71-41-0   | C5H12O  | 88.1  | 747.2  | 244.437  | 1.261     |
| 11    | 1-Butanol                   | 71-36-3   | C4H10O  | 74.1  | 636.7  | 172.019  | 1.196     |
| 12    | 1-Propanol                  | 71-23-8   | C3H8O   | 60.1  | 524.9  | 123.653  | 1.118     |
| 13    | Propyl hexanoate            | 626-77-7  | C9H18O2 | 158.2 | 1105.1 | 843.898  | 1.392     |
| 14    | 5-nonanone                  | 502-56-7  | C9H18O  | 142.2 | 1085.1 | 785.402  | 1.815     |
| 15    | Furaneol                    | 3658-77-3 | C6H8O3  | 128.1 | 1055.3 | 706.008  | 1.619     |
| 16    | Acetophenone                | 98-86-2   | C8H8O   | 120.2 | 1024.1 | 631.821  | 1.192     |
| 17    | 2-Heptanone                 | 110-43-0  | C7H14O  | 114.2 | 886.7  | 390.617  | 1.629     |
| 17'   | 2-Heptanone(dimer)          | 110-43-0  | C7H14O  | 114.2 | 887.1  | 391.171  | 1.261     |
| 18    | Cyclohexanone               | 108-94-1  | C6H10O  | 98.1  | 889.1  | 393.944  | 1.462     |
| 19    | Hexan-2-one                 | 591-78-6  | C6H12O  | 100.2 | 809.2  | 300.153  | 1.492     |
| 20    | 2-Hexanone                  | 591-78-6  | C6H12O  | 100.2 | 786.8  | 278.528  | 1.505     |
| 21    | 2-Butanone                  | 78-93-3   | C4H8O   | 72.1  | 589.5  | 149.126  | 1.244     |
| 22    | 2,3-Butanedione             | 431-03-8  | C4H6O2  | 86.1  | 552.2  | 133.683  | 1.156     |
| 23    | Benzaldehyde                | 100-52-7  | C7H6O   | 106.1 | 969.1  | 520.198  | 1.148     |
| 23'   | Benzaldehyde(dimer)         | 100-52-7  | C7H6O   | 106.1 | 987.5  | 555.154  | 1.463     |
| 24    | Octanal                     | 124-13-0  | C8H16O  | 128.2 | 983.2  | 546.768  | 1.399     |
| 25    | Heptanal                    | 111-71-7  | C7H14O  | 114.2 | 898.8  | 407.252  | 1.339     |
| 25'   | Heptanal(dimer)             | 111-71-7  | C7H14O  | 114.2 | 898.8  | 407.252  | 1.695     |
| 26    | Pentanal                    | 110-62-3  | C5H10O  | 86.1  | 737.5  | 236.800  | 1.431     |
| 27    | Butanal                     | 123-72-8  | C4H8O   | 72.1  | 555.6  | 135.006  | 1.278     |
| 28    | Propanal                    | 123-38-6  | C3H6O   | 58.1  | 469.5  | 106.167  | 1.046     |
| 29    | Hexanal                     | 111-27-3  | C6H14O  | 102.2 | 869.6  | 368.384  | 1.329     |
| 30    | Limonene                    | 138-86-3  | C10H16  | 136.2 | 1012.8 | 607.012  | 1.222     |
| 31    | $\alpha$ -Pinene            | 80-56-8   | C10H16  | 136.2 | 919.6  | 437.648  | 1.301     |
| 32    | Styrene                     | 100-42-5  | C8H8    | 104.2 | 911    | 424.772  | 1.441     |
| 33    | (Z)-3-Hexen-1-ol            | 928-96-1  | C6H12O  | 100.2 | 855.2  | 350.693  | 1.521     |
| 33'   | (Z)-3-Hexen-1-ol(dimer)     | 928-96-1  | C6H12O  | 100.2 | 855.2  | 350.693  | 1.239     |

|    |                      |          |                                              |       |       |         |       |
|----|----------------------|----------|----------------------------------------------|-------|-------|---------|-------|
| 34 | 2,5-Dimethylpyrazine | 123-32-0 | C <sub>6</sub> H <sub>8</sub> N <sub>2</sub> | 108.1 | 911.4 | 425.395 | 1.119 |
|----|----------------------|----------|----------------------------------------------|-------|-------|---------|-------|

---

Rt: Represented the retention time in the capillary GC column.

RI: Represented the retention index calculated using n-alkanes C<sub>9</sub>–C<sub>27</sub> as external standard on FS-SE-54-CB-1 column.

Dt: Represented the drift time in the drift tube.

**Table S3** The VIP value

| Var ID (Primary)     | M2.VIPpred |
|----------------------|------------|
| EGC                  | 1.444      |
| Polyphenols          | 1.343      |
| Heptanal             | 1.307      |
| GA                   | 1.290      |
| C                    | 1.237      |
| CAF                  | 1.197      |
| 1-Pentanol           | 1.180      |
| Propyl hexanoate     | 1.173      |
| Acetophenone         | 1.168      |
| Linalool             | 1.166      |
| TR/TF                | 1.156      |
| 2-Hexanone           | 1.151      |
| 5-Nonanone           | 1.144      |
| Cyclohexanone        | 1.127      |
| Hexanal              | 1.117      |
| Free amino acids     | 1.111      |
| Pentanal             | 1.099      |
| 2-Heptanone          | 1.082      |
| EC                   | 1.073      |
| 2,5-Dimethylpyrazine | 1.019      |
| Styrene              | 1.017      |
| Heptanal (dimer)     | 1.009      |
| 2-Hexen-1-ol         | 1.004      |
| Octanal (dimer)      | 1.000      |

**Table S4** Pearson correlation coefficient between aroma and VOCs

|                      | Floral | Caramel | Grassy | Fresh | Fruity |
|----------------------|--------|---------|--------|-------|--------|
| Heptanal             | -0.94  | -0.98   | 0.91   | -0.77 | -0.84  |
| 1-Pentanol           | 0.72   | 0.80    | -0.99  | 0.95  | 0.82   |
| Propyl hexanoate     | 0.74   | 0.86    | -1.00  | 0.90  | 0.88   |
| Acetophenone         | -0.88  | -0.82   | 0.96   | -0.97 | -0.72  |
| Linalool             | 0.36   | 0.69    | -0.84  | 0.66  | 0.91   |
| 2-Hexanone           | -0.73  | -0.97   | 0.93   | -0.69 | -0.98  |
| 5-Nonanone           | -0.49  | 0.03    | -0.03  | -0.24 | 0.41   |
| Cyclohexanone        | 0.90   | 0.97    | -0.96  | 0.82  | 0.87   |
| Hexanal              | 0.94   | 0.94    | -0.95  | 0.85  | 0.81   |
| Pentanal             | -0.94  | -0.78   | 0.88   | -0.93 | -0.59  |
| 2-Heptanone          | -0.97  | -0.96   | 0.86   | -0.72 | -0.77  |
| 2,5-Dimethylpyrazine | 0.95   | 0.96    | -0.93  | 0.82  | 0.82   |
| Styrene              | -0.92  | -0.79   | 0.54   | -0.42 | -0.47  |
| Heptanal (dimer)     | -0.90  | -0.92   | 0.98   | -0.90 | -0.83  |
| 2-Hexen-1-ol         | -0.89  | -0.84   | 0.96   | -0.96 | -0.73  |
| Octanal (dimer)      | -0.78  | -0.40   | 0.56   | -0.78 | -0.11  |

**Table S5** Pearson correlation coefficient between taste and biochemical composition

|                  | Mellow | Sweet aftertaste | Astringent | Sour  | Bitter |
|------------------|--------|------------------|------------|-------|--------|
| EGC              | 0.88   | 0.93             | -0.97      | -0.98 | -0.93  |
| Polyphenols      | 0.97   | 0.91             | -0.77      | -0.77 | -0.63  |
| GA               | 0.96   | 0.98             | -0.95      | -0.96 | -0.86  |
| C                | 0.92   | 0.83             | -0.62      | -0.60 | -0.33  |
| CAF              | -0.21  | -0.18            | 0.22       | 0.29  | 0.66   |
| TR/TF            | 0.98   | 0.99             | -0.92      | -0.90 | -0.65  |
| EC               | -0.80  | -0.87            | 0.95       | 0.97  | 0.98   |
| Free amino acids | 0.94   | 0.97             | -0.96      | -0.97 | -0.88  |
